# Supplementary material
Source: PubMed Central journal article supplement (PMC3930325)

Figure S2 Luo et al.

770 m, South Atlantic Gyre  
 800 m, North Pacific Gyre  
 400 m, Antarctic  
 Circumpolar Deep Water  
 80 m, Antarctic Winter Water  
 Surface, Gulf of Maine

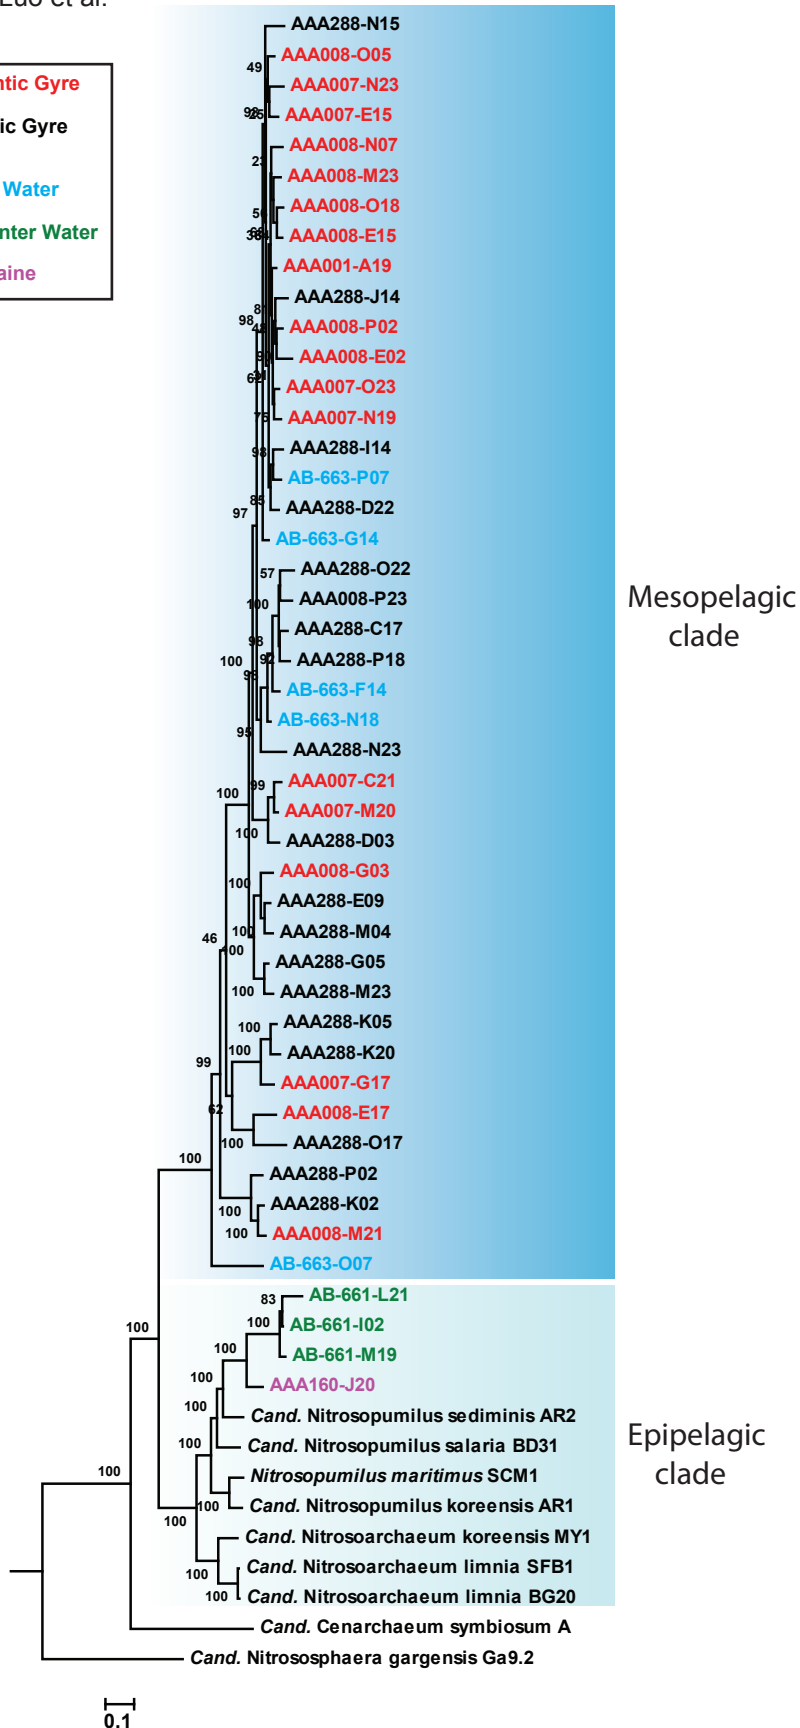

Supplement: 41396_2014_BFismej2013202_MOESM66_ESM.pdf [file 41396_2014_BFismej2013202_MOESM66_ESM.pdf]
