# Supplementary material
Source: PubMed Central journal article supplement (PMC3930325)
Supplement: 41396_2014_BFismej2013202_MOESM67_ESM.pdf [file 41396_2014_BFismej2013202_MOESM67_ESM.pdf]

Table S1. Characteristics of 46 marine Thaumarchaeota single-cell amplified genomes.

| SAG ID<br>(SCGC-) | IMG Taxon<br>ID | Location <sup>1</sup> | Latitude      | Longitude     | Date      | Depth<br>(m) | Temp<br>eratur<br>e ( °C) | Salinit<br>y<br>(PSU) | Assembl<br>y size <sup>2</sup><br>(Mbp) | No.<br>contigs | No.<br>genes |
|-------------------|-----------------|-----------------------|---------------|---------------|-----------|--------------|---------------------------|-----------------------|-----------------------------------------|----------------|--------------|
| AB-661-I02        | 2524023096      | WW                    | 64°24.16'S    | 64°55.9'W     | 11Jan2011 | 80           | -0.51                     | 33.93                 | 0.52                                    | 70             | 685          |
| AB-661-L21        | 2524023084      | WW                    | 64°24.16'S    | 64°55.9'W     | 11Jan2011 | 80           | -0.51                     | 33.93                 | 0.51                                    | 51             | 646          |
| AB-661-M19        | 2524023095      | WW                    | 64°24.16'S    | 64°55.9'W     | 11Jan2011 | 80           | -0.51                     | 33.93                 | 0.58                                    | 57             | 740          |
| AB-663-F14        | 2523533633      | CDW                   | 64°24.16'S    | 64°55.9'W     | 11Jan2011 | 400          | 1.4                       | 34.64                 | 0.57                                    | 107            | 776          |
| AB-663-G14        | 2524023085      | CDW                   | 64°24.16'S    | 64°55.9'W     | 11Jan2011 | 400          | 1.4                       | 34.64                 | 0.58                                    | 78             | 755          |
| AB-663-N18        | 2524023093      | CDW                   | 64°24.16'S    | 64°55.9'W     | 11Jan2011 | 400          | 1.4                       | 34.64                 | 0.36                                    | 53             | 450          |
| AB-663-O07        | 2524023092      | CDW                   | 64°24.16'S    | 64°55.9'W     | 11Jan2011 | 400          | 1.4                       | 34.64                 | 0.48                                    | 37             | 598          |
| AB-663-P07        | 2524023094      | CDW                   | 64°24.16'S    | 64°55.9'W     | 11Jan2011 | 400          | 1.4                       | 34.64                 | 0.82                                    | 38             | 1010         |
| AAA160-J20        | 2529292698      | GOM                   | 43°50'39.87"N | 69°38'27.49"W | 16Sep2009 | 1            | 22.3                      | 30                    | 0.56                                    | 99             | 726          |
| AAA007-O23        | 2527291500      | SA                    | 12°29'41.4"S  | 4°59'55.2"W   | 01Dec2007 | 800          | 4.8                       | 34.5                  | 1.13                                    | 67             | 1393         |
| AAA001-A19        | 2513237067      | SA                    | 12°29'41.4"S  | 4°59'55.2"W   | 01Dec2007 | 800          | 4.8                       | 34.5                  | 0.76                                    | 223            | 1114         |
| AAA007-N19        | 2513237068      | SA                    | 12°29'41.4"S  | 4°59'55.2"W   | 01Dec2007 | 800          | 4.8                       | 34.5                  | 0.89                                    | 194            | 1295         |
| AAA007-C21        | 2524023106      | SA                    | 12°29'41.4"S  | 4°59'55.2"W   | 01Dec2007 | 800          | 4.8                       | 34.5                  | 0.28                                    | 185            | 451          |
| AAA007-E15        | 2524023107      | SA                    | 12°29'41.4"S  | 4°59'55.2"W   | 01Dec2007 | 800          | 4.8                       | 34.5                  | 0.45                                    | 244            | 704          |
| AAA007-G17        | 2524023108      | SA                    | 12°29'41.4"S  | 4°59'55.2"W   | 01Dec2007 | 800          | 4.8                       | 34.5                  | 0.34                                    | 189            | 581          |
| AAA007-M20        | 2524023109      | SA                    | 12°29'41.4"S  | 4°59'55.2"W   | 01Dec2007 | 800          | 4.8                       | 34.5                  | 0.30                                    | 253            | 503          |
| AAA007-N23        | 2524023110      | SA                    | 12°29'41.4"S  | 4°59'55.2"W   | 01Dec2007 | 800          | 4.8                       | 34.5                  | 0.17                                    | 123            | 298          |
| AAA008-E02        | 2524023111      | SA                    | 12°29'41.4"S  | 4°59'55.2"W   | 01Dec2007 | 800          | 4.8                       | 34.5                  | 0.53                                    | 283            | 838          |
| AAA008-E15        | 2524023112      | SA                    | 12°29'41.4"S  | 4°59'55.2"W   | 01Dec2007 | 800          | 4.8                       | 34.5                  | 0.46                                    | 236            | 706          |
| AAA008-E17        | 2524023113      | SA                    | 12°29'41.4"S  | 4°59'55.2"W   | 01Dec2007 | 800          | 4.8                       | 34.5                  | 0.43                                    | 257            | 730          |
| AAA008-G03        | 2524023114      | SA                    | 12°29'41.4"S  | 4°59'55.2"W   | 01Dec2007 | 800          | 4.8                       | 34.5                  | 0.53                                    | 236            | 852          |
| AAA008-M21        | 2524023115      | SA                    | 12°29'41.4"S  | 4°59'55.2"W   | 01Dec2007 | 800          | 4.8                       | 34.5                  | 0.36                                    | 197            | 606          |
| AAA008-M23        | 2524023116      | SA                    | 12°29'41.4"S  | 4°59'55.2"W   | 01Dec2007 | 800          | 4.8                       | 34.5                  | 0.35                                    | 171            | 558          |
| AAA008-N07        | 2524023117      | SA                    | 12°29'41.4"S  | 4°59'55.2"W   | 01Dec2007 | 800          | 4.8                       | 34.5                  | 0.28                                    | 163            | 489          |
| AAA008-O05        | 2524023118      | SA                    | 12°29'41.4"S  | 4°59'55.2"W   | 01Dec2007 | 800          | 4.8                       | 34.5                  | 0.35                                    | 150            | 557          |
| AAA008-O18        | 2524023119      | SA                    | 12°29'41.4"S  | 4°59'55.2"W   | 01Dec2007 | 800          | 4.8                       | 34.5                  | 0.39                                    | 234            | 653          |
| AAA008-P02        | 2524023120      | SA                    | 12°29'41.4"S  | 4°59'55.2"W   | 01Dec2007 | 800          | 4.8                       | 34.5                  | 0.44                                    | 195            | 735          |
| AAA008-P23        | 2524023121      | SA                    | 12°29'41.4"S  | 4°59'55.2"W   | 01Dec2007 | 800          | 4.8                       | 34.5                  | 0.50                                    | 230            | 801          |
| AAA288-I14        | 2513237066      | NP                    | 22°45' N      | 158°00' W     | 09Sep2009 | 770          | 4.7                       | 34.3                  | 1.06                                    | 153            | 1534         |
| AAA288-J14        | 2513237065      | NP                    | 22°45' N      | 158°00' W     | 09Sep2009 | 770          | 4.7                       | 34.3                  | 0.68                                    | 253            | 1073         |

|            |            |    |          |           |           |     |     |      |      |     |      |
|------------|------------|----|----------|-----------|-----------|-----|-----|------|------|-----|------|
| AAA288-C17 | 2524023122 | NP | 22°45' N | 158°00' W | 09Sep2009 | 770 | 4.7 | 34.3 | 0.59 | 269 | 953  |
| AAA288-D03 | 2524023123 | NP | 22°45' N | 158°00' W | 09Sep2009 | 770 | 4.7 | 34.3 | 0.53 | 335 | 880  |
| AAA288-D22 | 2524023124 | NP | 22°45' N | 158°00' W | 09Sep2009 | 770 | 4.7 | 34.3 | 0.55 | 234 | 859  |
| AAA288-E09 | 2524023125 | NP | 22°45' N | 158°00' W | 09Sep2009 | 770 | 4.7 | 34.3 | 0.55 | 300 | 887  |
| AAA288-G05 | 2524023126 | NP | 22°45' N | 158°00' W | 09Sep2009 | 770 | 4.7 | 34.3 | 0.71 | 242 | 1063 |
| AAA288-K02 | 2524023127 | NP | 22°45' N | 158°00' W | 09Sep2009 | 770 | 4.7 | 34.3 | 0.66 | 319 | 1053 |
| AAA288-K05 | 2524023128 | NP | 22°45' N | 158°00' W | 09Sep2009 | 770 | 4.7 | 34.3 | 0.49 | 279 | 803  |
| AAA288-K20 | 2524023097 | NP | 22°45' N | 158°00' W | 09Sep2009 | 770 | 4.7 | 34.3 | 0.57 | 288 | 888  |
| AAA288-M04 | 2524023098 | NP | 22°45' N | 158°00' W | 09Sep2009 | 770 | 4.7 | 34.3 | 0.56 | 327 | 917  |
| AAA288-M23 | 2524023099 | NP | 22°45' N | 158°00' W | 09Sep2009 | 770 | 4.7 | 34.3 | 0.51 | 320 | 847  |
| AAA288-N15 | 2524023100 | NP | 22°45' N | 158°00' W | 09Sep2009 | 770 | 4.7 | 34.3 | 0.27 | 170 | 500  |
| AAA288-N23 | 2524023101 | NP | 22°45' N | 158°00' W | 09Sep2009 | 770 | 4.7 | 34.3 | 0.49 | 248 | 768  |
| AAA288-O17 | 2524023102 | NP | 22°45' N | 158°00' W | 09Sep2009 | 770 | 4.7 | 34.3 | 0.13 | 127 | 249  |
| AAA288-O22 | 2524023103 | NP | 22°45' N | 158°00' W | 09Sep2009 | 770 | 4.7 | 34.3 | 0.37 | 178 | 621  |
| AAA288-P02 | 2524023104 | NP | 22°45' N | 158°00' W | 09Sep2009 | 770 | 4.7 | 34.3 | 0.86 | 307 | 1274 |
| AAA288-P18 | 2524023105 | NP | 22°45' N | 158°00' W | 09Sep2009 | 770 | 4.7 | 34.3 | 0.68 | 335 | 1091 |

<sup>1</sup>WW (Antarctic Winter Water), CDW (Antartic Circumpolar Deep Water), GOM (Gulf of Maine), SA (South Atlantic gyre), NP (North Pacific gyre).

<sup>2</sup>The cultured reference strain *Nitrosopumilus maritimus* scm1 has a genome size of 1.65 Mbp.
