# Supplementary material
Source: PubMed Central journal article supplement (PMC3930325)
Supplement: 41396_2014_BFismej2013202_MOESM68_ESM.pdf [file 41396_2014_BFismej2013202_MOESM68_ESM.pdf]

Table S2. COG annotation of the 97 proteins used for phylogenomic analysis.

| COG id  | Biological function                                                                    |
|---------|----------------------------------------------------------------------------------------|
| COG0541 | Signal recognition particle GTPase                                                     |
| COG2511 | Archaeal Glu-tRNA <sup>Gln</sup> amidotransferase subunit E (contains GAD domain)      |
| COG0252 | L-asparaginase/archaeal Glu-tRNA <sup>Gln</sup> amidotransferase subunit D             |
| COG5257 | Translation initiation factor 2, gamma subunit (eIF-2gamma; GTPase)                    |
| COG0152 | Phosphoribosylaminoimidazolesuccinocarboxamide (SAICAR) synthase                       |
| COG1797 | Cobyrinic acid a,c-diamide synthase                                                    |
| COG2138 | Uncharacterized conserved protein                                                      |
| COG2082 | Precorrin isomerase                                                                    |
| COG0096 | Ribosomal protein S8                                                                   |
| COG0113 | Delta-aminolevulinic acid dehydratase                                                  |
| COG1881 | Phospholipid-binding protein                                                           |
| COG2109 | ATP:corrinoid adenosyltransferase                                                      |
| COG0468 | RecA/RadA recombinase                                                                  |
| COG0126 | 3-phosphoglycerate kinase                                                              |
| COG0520 | Selenocysteine lyase                                                                   |
| COG1093 | Translation initiation factor 2, alpha subunit (eIF-2alpha)                            |
| COG0615 | Cytidyltransferase                                                                     |
| COG0097 | Ribosomal protein L6P/L9E                                                              |
| COG0128 | 5-enolpyruvylshikimate-3-phosphate synthase                                            |
| COG2260 | Predicted Zn-ribbon RNA-binding protein                                                |
| COG0093 | Ribosomal protein L14                                                                  |
| COG0396 | ABC-type transport system involved in Fe-S cluster assembly, ATPase component          |
| COG0090 | Ribosomal protein L2                                                                   |
| COG0092 | Ribosomal protein S3                                                                   |
| COG1471 | Ribosomal protein S4E                                                                  |
| COG0034 | Glutamine phosphoribosylpyrophosphate amidotransferase                                 |
| COG1339 | Transcriptional regulator of a riboflavin/FAD biosynthetic operon                      |
| COG2090 | Uncharacterized protein conserved in archaea                                           |
| COG1675 | Transcription initiation factor IIE, alpha subunit                                     |
| COG0048 | Ribosomal protein S12                                                                  |
| COG2125 | Ribosomal protein S6E (S10)                                                            |
| COG0225 | Peptide methionine sulfoxide reductase                                                 |
| COG0504 | CTP synthase (UTP-ammonia lyase)                                                       |
| COG0169 | Shikimate 5-dehydrogenase                                                              |
| COG1303 | Uncharacterized protein conserved in archaea                                           |
| COG2139 | Ribosomal protein L21E                                                                 |
| COG1324 | Uncharacterized protein involved in tolerance to divalent cations                      |
| COG2262 | GTPases                                                                                |
| COG0088 | Ribosomal protein L4                                                                   |
| COG0100 | Ribosomal protein S11                                                                  |
| COG0010 | Arginase/agmatinase/formimionoglutamate hydrolase, arginase family                     |
| COG1958 | Small nuclear ribonucleoprotein (snRNP) homolog                                        |
| COG1646 | Predicted phosphate-binding enzymes, TIM-barrel fold                                   |
| COG0189 | Glutathione synthase/Ribosomal protein S6 modification enzyme (glutaminyl transferase) |
| COG4830 | Ribosomal protein S26                                                                  |
| COG1547 | Uncharacterized conserved protein                                                      |
| COG1258 | Predicted pseudouridylate synthase                                                     |
| COG0265 | Trypsin-like serine proteases, typically periplasmic, contain C-terminal PDZ domain    |

---

|         |                                                                                                                   |
|---------|-------------------------------------------------------------------------------------------------------------------|
| COG1412 | Uncharacterized proteins of PilT N-term./Vapc superfamily                                                         |
| COG0199 | Ribosomal protein S14                                                                                             |
| COG0287 | Prephenate dehydrogenase                                                                                          |
| COG1798 | Diphthamide biosynthesis methyltransferase                                                                        |
| COG0094 | Ribosomal protein L5                                                                                              |
| COG1903 | Cobalamin biosynthesis protein CbiD                                                                               |
| COG2890 | Methylase of polypeptide chain release factors                                                                    |
| COG2073 | Cobalamin biosynthesis protein CbiG                                                                               |
| COG1867 | N <sup>2</sup> ,N <sup>2</sup> -dimethylguanosine tRNA methyltransferase                                          |
| COG2875 | Precorrin-4 methylase                                                                                             |
| COG0667 | Predicted oxidoreductases (related to aryl-alcohol dehydrogenases)                                                |
| COG1491 | Predicted RNA-binding protein                                                                                     |
| COG2429 | Uncharacterized conserved protein                                                                                 |
| COG1985 | Pyrimidine reductase, riboflavin biosynthesis                                                                     |
| COG0358 | DNA primase (bacterial type)                                                                                      |
| COG0057 | Glyceraldehyde-3-phosphate dehydrogenase/erythrose-4-phosphate dehydrogenase                                      |
| COG1024 | Enoyl-CoA hydratase/carnithine racemase                                                                           |
| COG1537 | Predicted RNA-binding proteins                                                                                    |
| COG0671 | Membrane-associated phospholipid phosphatase                                                                      |
| COG4221 | Short-chain alcohol dehydrogenase of unknown specificity                                                          |
| COG0087 | Ribosomal protein L3                                                                                              |
| COG0186 | Ribosomal protein S17                                                                                             |
| COG1460 | Uncharacterized protein conserved in archaea                                                                      |
| COG0091 | Ribosomal protein L22                                                                                             |
| COG0644 | Dehydrogenases (flavoproteins)                                                                                    |
| COG1587 | Uroporphyrinogen-III synthase                                                                                     |
| COG0049 | Ribosomal protein S7                                                                                              |
| COG0030 | Dimethyladenosine transferase (rRNA methylation)                                                                  |
| COG2241 | Precorrin-6B methylase 1                                                                                          |
| COG0185 | Ribosomal protein S19                                                                                             |
| COG0863 | DNA modification methylase                                                                                        |
| COG1180 | Pyruvate-formate lyase-activating enzyme                                                                          |
| COG0195 | Transcription elongation factor                                                                                   |
| COG3253 | Uncharacterized conserved protein                                                                                 |
| COG1254 | Acylphosphatases                                                                                                  |
| COG1378 | Predicted transcriptional regulators                                                                              |
| COG1439 | Predicted nucleic acid-binding protein, consists of a PIN domain and a Zn-ribbon module                           |
| COG1522 | Transcriptional regulators                                                                                        |
| COG1964 | Predicted Fe-S oxidoreductases                                                                                    |
| COG1599 | Single-stranded DNA-binding replication protein A (RPA), large (70 kD) subunit and related ssDNA-binding proteins |
| COG1940 | Transcriptional regulator/sugar kinase                                                                            |
| COG0054 | Riboflavin synthase beta-chain                                                                                    |
| COG0255 | Ribosomal protein L29                                                                                             |
| COG2242 | Precorrin-6B methylase 2                                                                                          |
| COG1409 | Predicted phosphohydrolases                                                                                       |
| COG1382 | Prefoldin, chaperonin cofactor                                                                                    |
| COG1703 | Putative periplasmic protein kinase ArgK and related GTPases of G3E family                                        |
| COG3185 | 4-hydroxyphenylpyruvate dioxygenase and related hemolysins                                                        |
| COG0805 | Sec-independent protein secretion pathway component TatC                                                          |

---
