# Supplementary material
Source: PubMed Central journal article supplement (PMC3930325)
Supplement: 41396_2014_BFismej2013202_MOESM69_ESM.pdf [file 41396_2014_BFismej2013202_MOESM69_ESM.pdf]

Table S3. Examples of gene families distributed in the epi- and mesopelagic clades of marine Thaumarchaeota.

| Family id <sup>1</sup> | Gene                                                         | Epipelagic SAGs (N=4) | Nmar <sup>2</sup> (N=1) | Mesopelagic SAGs (N=42) |
|------------------------|--------------------------------------------------------------|-----------------------|-------------------------|-------------------------|
| OR3550                 | urease subunit alpha                                         | 0                     | 0                       | 2                       |
| OR3005                 | urease subunit beta                                          | 0                     | 0                       | 3                       |
| OR3010                 | urease accessory protein UreD                                | 0                     | 0                       | 3                       |
| OR2375                 | urease accessory protein                                     | 0                     | 0                       | 7                       |
| OR2177                 | urease accessory protein                                     | 0                     | 0                       | 8                       |
| OR2326                 | urea amidohydrolase subunit gamma                            | 0                     | 0                       | 8                       |
| OR2294                 | urease accessory protein                                     | 0                     | 0                       | 8                       |
| OR2270                 | urease accessory protein UreD                                | 0                     | 0                       | 9                       |
| OR1967                 | urea active transporter                                      | 0                     | 0                       | 10                      |
| OR2098                 | urease subunit alpha                                         | 0                     | 0                       | 10                      |
| OR3671                 | Deoxyribodipyrimidine photolyase                             | 1                     | 0                       | 0                       |
| OR3847                 | twin-arginine translocation pathway signal                   | 2                     | 0                       | 0                       |
| OR2460                 | universal stress protein                                     | 3                     | 1                       | 0                       |
| OR3848                 | catalase/peroxidase HPI                                      | 2                     | 0                       | 0                       |
| OR2257                 | ammonia monooxygenase, subunit A                             | 2                     | 1                       | 6                       |
| OR2022                 | ammonium transporter                                         | 2                     | 1                       | 8                       |
| OR1861                 | superoxide dismutase                                         | 3                     | 1                       | 11                      |
| OR2115                 | ammonia monooxygenase operon-associated hypothetical protein | 2                     | 1                       | 9                       |
| OR2077                 | ammonia monooxygenase subunit B                              | 2                     | 1                       | 10                      |
| OR1607                 | blue (type1) copper domain-containing protein                | 2                     | 1                       | 17                      |
| OR1653                 | multicopper oxidase type 3                                   | 2                     | 1                       | 17                      |
| OR1554                 | ammonia monooxygenase/methane monooxygenase subunit C        | 2                     | 1                       | 19                      |
| OR1042                 | DSBA oxidoreductase                                          | 3                     | 1                       | 27                      |
| OR2116                 | peroxiredoxin                                                | 2                     | 1                       | 9                       |
| OR1393                 | peroxiredoxin                                                | 1                     | 1                       | 22                      |
| OR1993                 | peroxiredoxin                                                | 0                     | 1                       | 13                      |
| OR1659                 | peroxiredoxin                                                | 0                     | 1                       | 18                      |
| OR2405                 | peroxiredoxin                                                | 0                     | 0                       | 5                       |
| OR1050                 | blue (type1) copper domain-containing protein                | 3                     | 1                       | 30                      |
| OR1688                 | blue (type1) copper domain-containing protein                | 1                     | 1                       | 18                      |
| OR1569                 | blue (type1) copper domain-containing protein                | 0                     | 1                       | 18                      |

<sup>1</sup>These are orthologous gene families identified by the OrthoMCL software; the family id is arbitrary.

<sup>2</sup>Nmar: *Nitrosopumilus maritimus* scm1, the only marine Thaumarchaeota strain in pure culture.
