# Supplementary material
Source: PubMed Central journal article supplement (PMC3930325)

Figure S1 Luo et al.

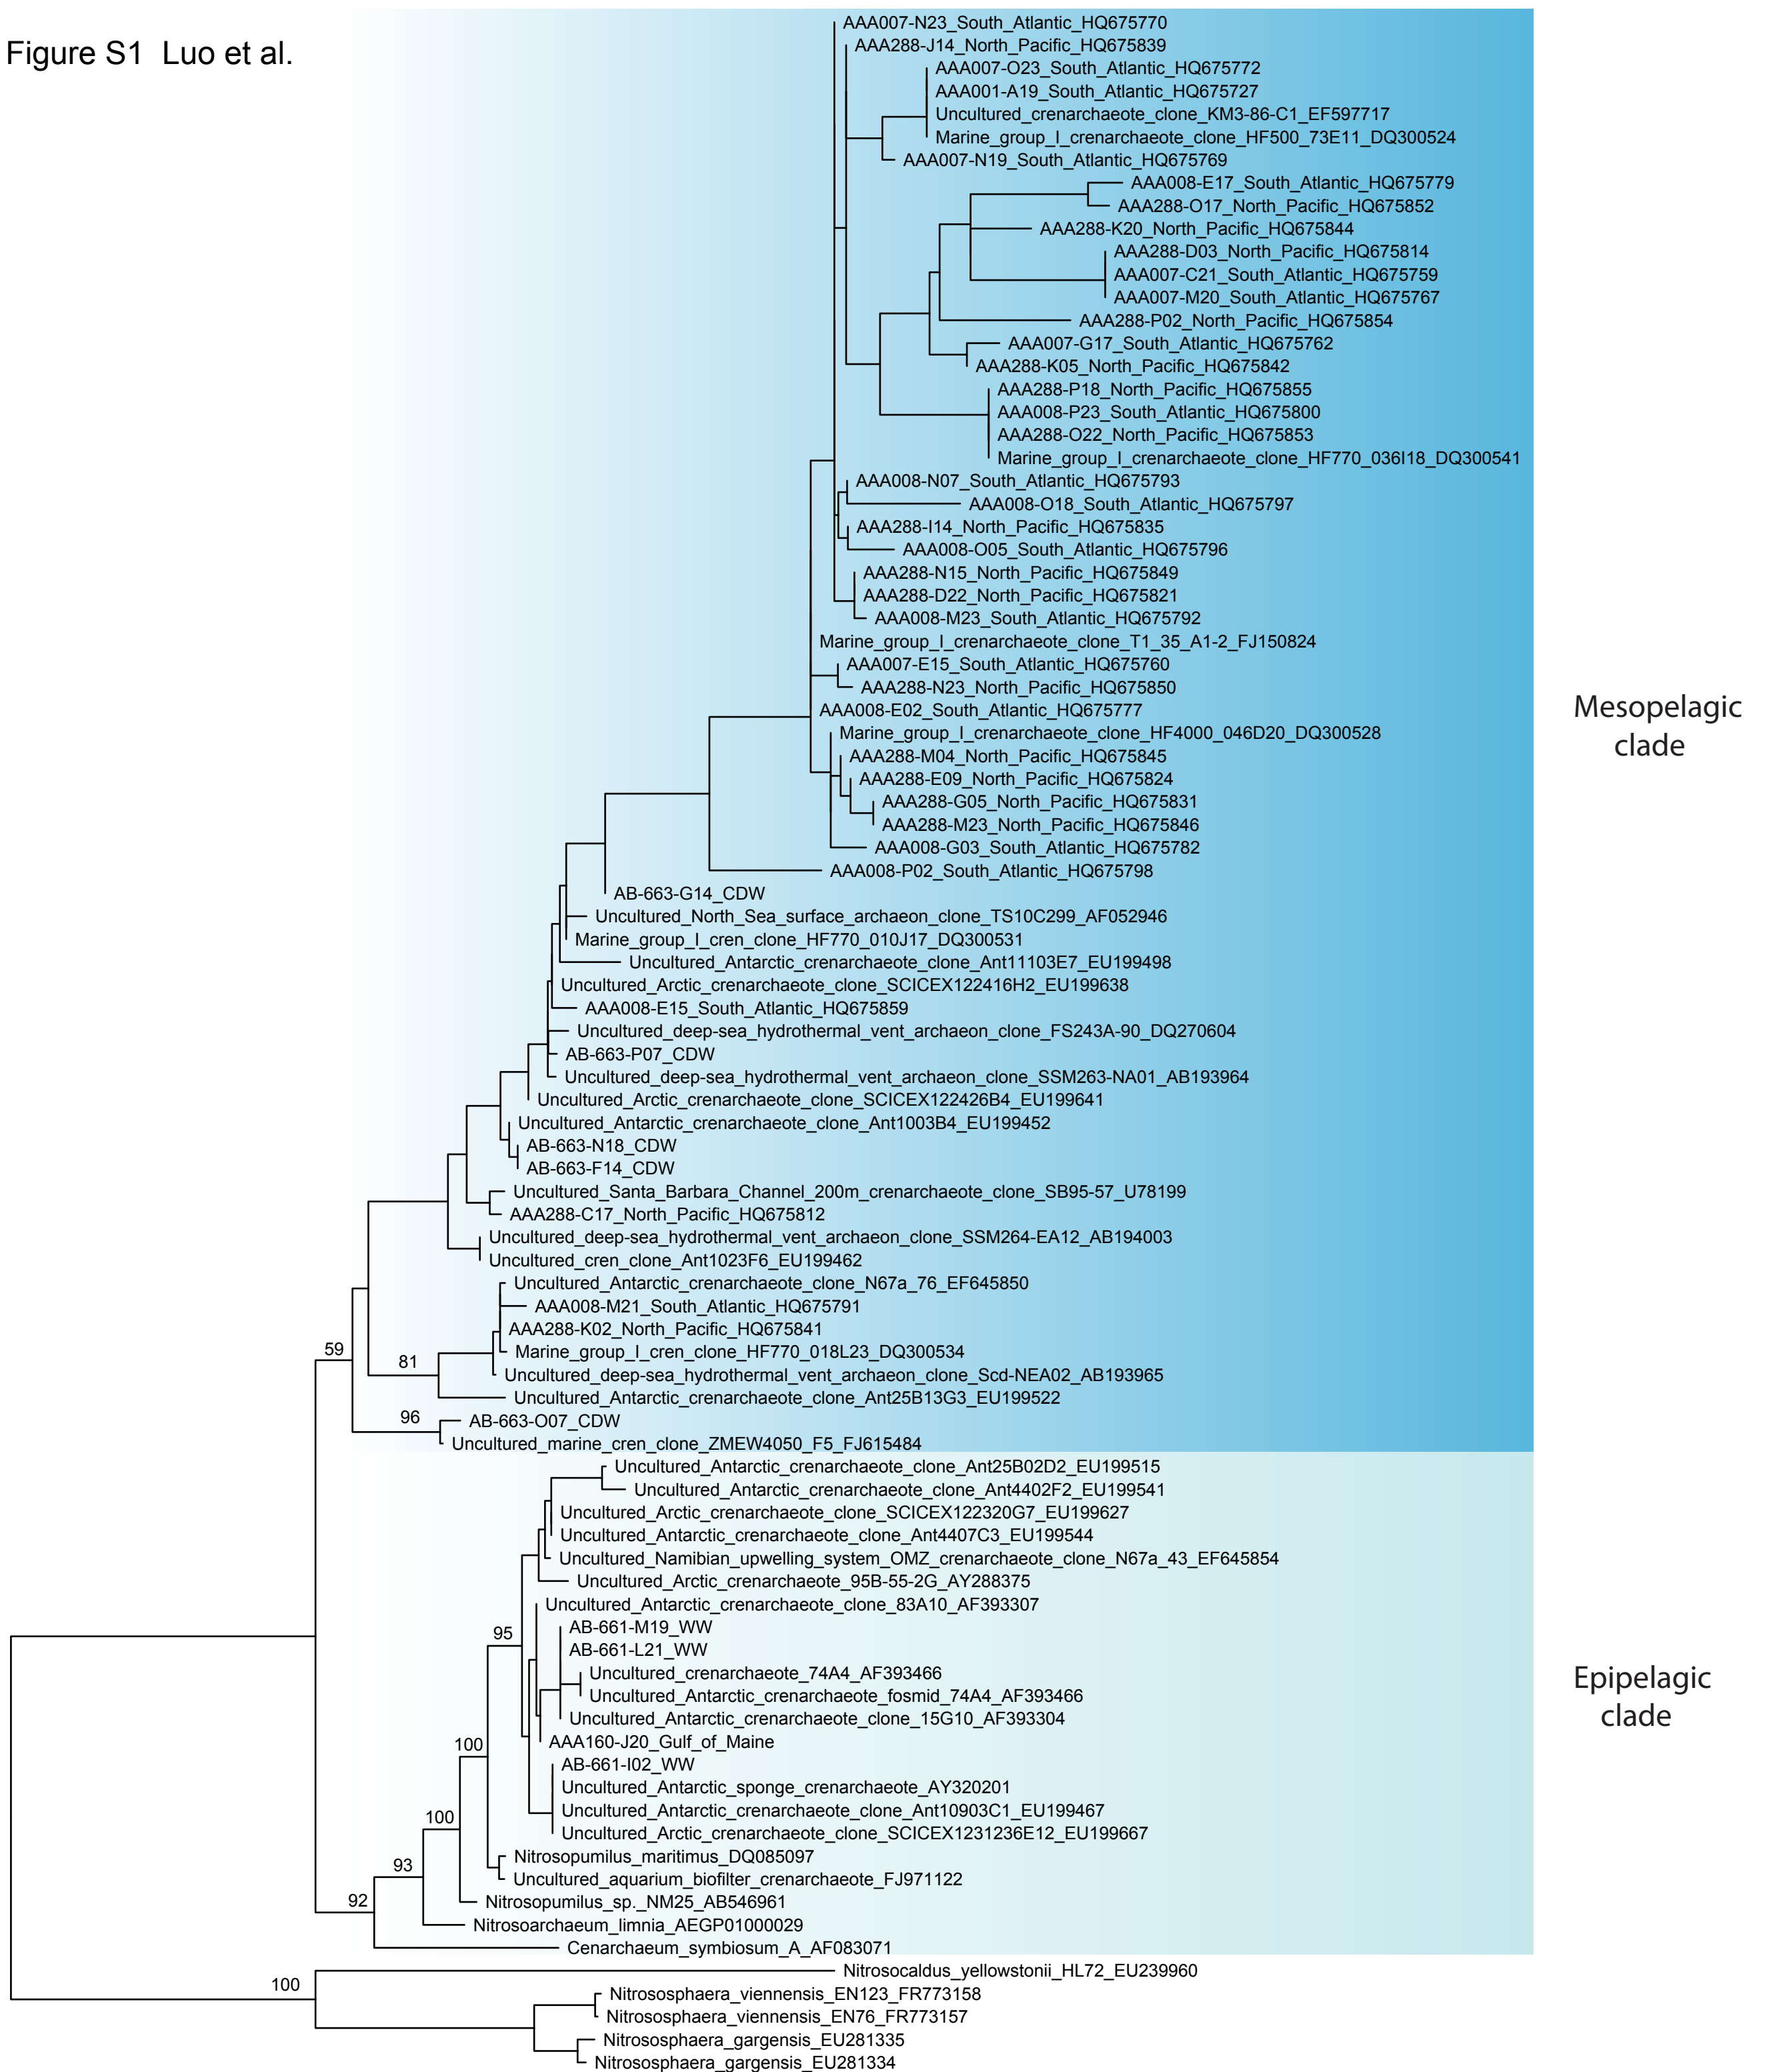

Supplement: 41396_2014_BFismej2013202_MOESM65_ESM.pdf [file 41396_2014_BFismej2013202_MOESM65_ESM.pdf]
